# Supplementary material for: Effects of acceleration on gait measures in three horse gaits
Source: Oxford University Press journal article supplement (doi:10.1242/jeb.113225), 2015-01-01
Supplement: jeb113225supp.pdf [file jeb113225supp.pdf]

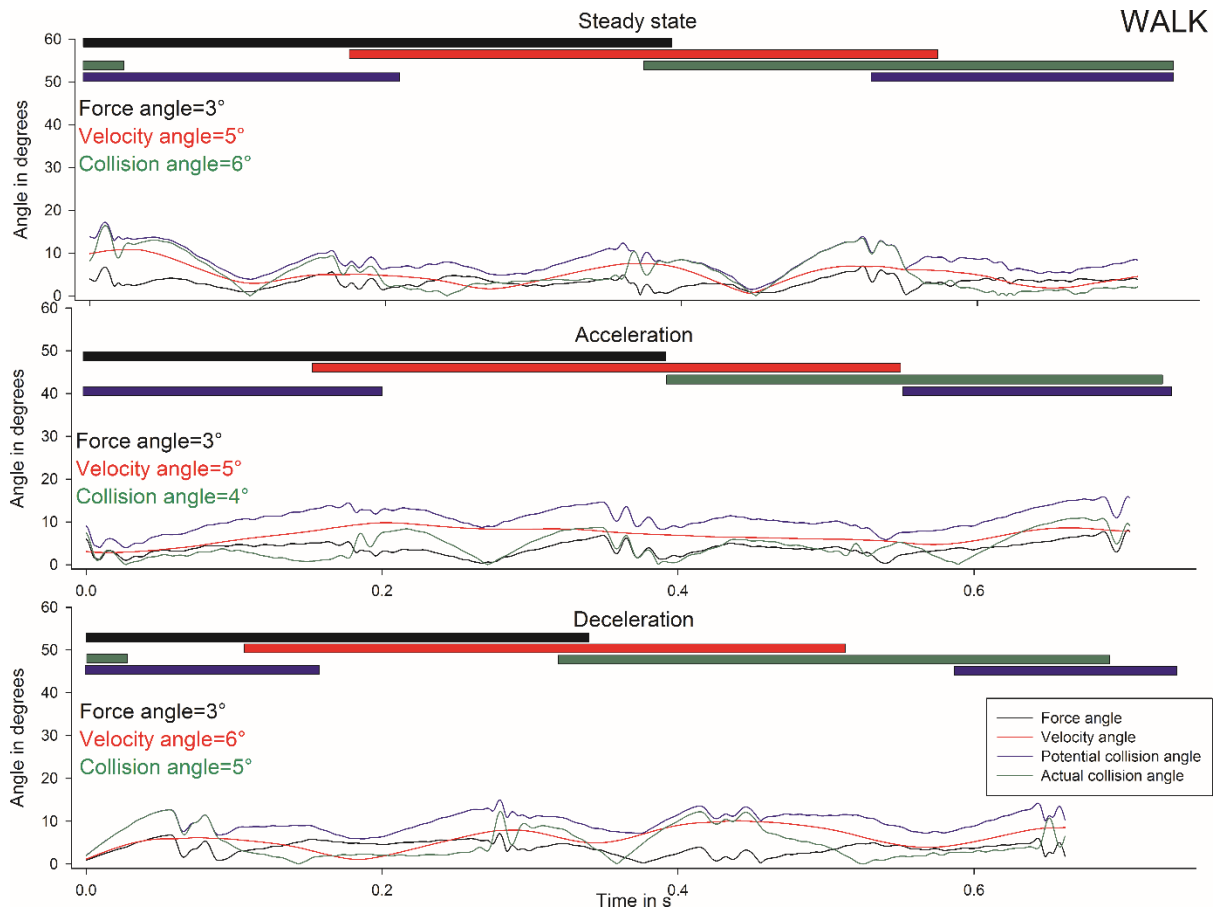

**Fig. S1.** Example trial of force angle (black), velocity angle (red), potential (blue) and actual (green) collision angle over one walk stride in steady state (top panel), in acceleration (middle panel) and deceleration (bottom panel). Footfalls are indicated above the graph as a coloured bar during stance in the same colours as used in figure 5: red, right fore; blue, left fore; black, right hind and green, left hind. Weighted average force angle, velocity angle and collision angle is provided for this particular example.

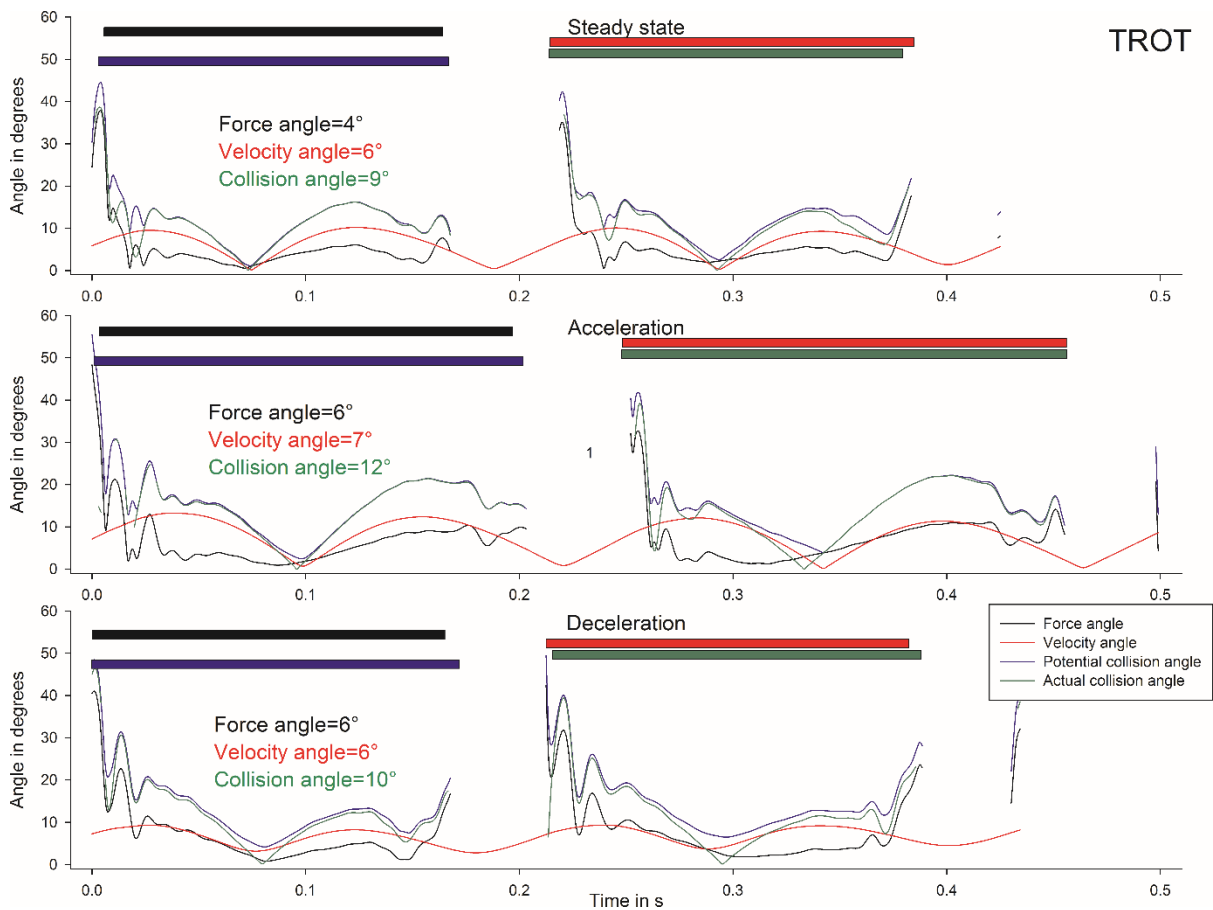

**Fig. S2.** Example trial of force angle (black), velocity angle (red), potential (blue) and actual (green) collision angle over one trot stride in steady state (top panel), in acceleration (middle panel) and deceleration (bottom panel). Footfalls are indicated above the graph as a coloured bar during stance in the same colours as used in figure 5: red, right fore; blue, left fore; black, right hind and green, left hind. Weighted average force angle, velocity angle and collision angle is provided for this particular example.

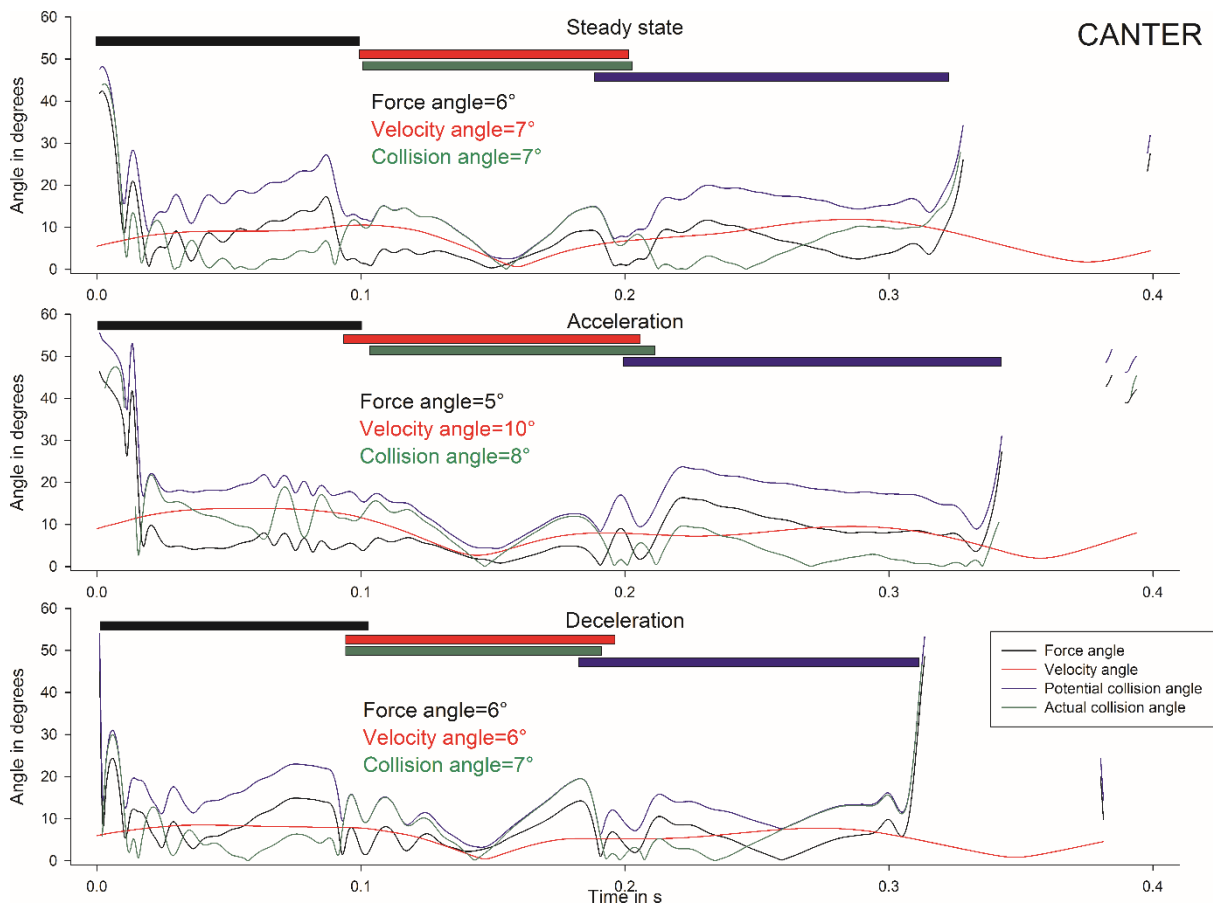

**Fig. S3.** Example trial of force angle (black), velocity angle (red), potential (blue) and actual (green) collision angle over one canter stride in steady state (top panel), in acceleration (middle panel) and deceleration (bottom panel). Footfalls are indicated above the graph as a coloured bar during stance in the same colours as used in figure 5: red, right fore; blue, left fore; black, right hind and green, left hind. Weighted average force angle, velocity angle and collision angle is provided for this particular example.
